# Supplementary material
Source: PubMed Central journal article supplement (PMC9384593)
Supplement: riac026_suppl_supplementary_material.pdf [file riac026_suppl_supplementary_material.pdf]

## **Supplementary Material 1:**

### **Google scholar and WHO Keywords**

"Post COVID-19 discharge" OR "post COVID-19 follow-up" OR "COVID-19 long-term complications" OR "post COVID-19 complications" OR "COVID-19 survivors OR "long COVID"

PubMed keywords: (((((Post COVID-19 discharge) OR (post COVID-19 follow-up)) OR (COVID-19 long-term complications)) OR (post COVID-19 complications)) OR (COVID-19 survivors)) OR (Long COVID))

Inclusion criteria: since December 2020, about COVID-19, written in English, has empirical data about post-healing follow-up/complications.

Study selection: Original studies reporting clinical outcomes of COVID-19 survivors 3 months after admission or 2 months after discharge will be included.

### **Selection process**

1. All studies were first screened using the title and abstract.
2. At this stage abstracts with any mention of follow-up were included.
3. Full texts of selected abstracts will be then screened to ensure that all of the above selection criteria were met.

PubMed =1,598 results

Google scholar=1,566 results

WHO= 110 results
