# Supplementary material
Source: PubMed Central journal article supplement (PMC9384593)
Supplement: riac026_suppl_supplementary_table_s1.pdf [file riac026_suppl_supplementary_table_s1.pdf]

**Supplementary Table S1: The summary of included studies**

|   | Title                                                                                                                          | First author name, journal, year                 | Country      | Study design       | Participants number | Follow-up period        | Follow-up duration          | Objective                                                           | Findings                                                                                                                              |
|---|--------------------------------------------------------------------------------------------------------------------------------|--------------------------------------------------|--------------|--------------------|---------------------|-------------------------|-----------------------------|---------------------------------------------------------------------|---------------------------------------------------------------------------------------------------------------------------------------|
| 1 | Anxiety and depression in COVID-19 survivors: Role of inflammatory and clinical predictors.                                    | Mario et al, <i>Brain Behav Immun</i> , 2020.    | Italy        | Prospective cohort | 402                 | Post hospital discharge | 1 month/<br>31.29 ± 15.7    | Investigate the psychopathological impact of COVID-19 in survivors. | 28% for PTSD, 31% for depression, 42% for anxiety, 20% for OC symptoms, and 40% for insomnia.                                         |
| 2 | Post-discharge symptoms and rehabilitation needs in survivors of COVID-19 infection: A cross-sectional evaluation.             | Stephen J Halpin et al, <i>J Med Virol</i> 2020. | UK           | Cross-sectional    | 100                 | Post hospital discharge | 4 to 8 weeks (mean 48 days) | Measure the prevalence of post-COVID-19 symptoms.                   | Breathlessness (65.6%) in ICU group and 42.6% in ward group) and psychological distress (46.9% in ICU group and 23.5% in ward group)  |
| 3 | Medium term follow-up of 337 patients with coronavirus disease 2019 (COVID-19) in a Fang cang shelter hospital in Wuhan, China | Nao Yan et al, <i>Front Med</i> , 2020.          | Wuhan, China | Prospective study  | 337                 | Post hospital discharge | 7.5 IQR (6–13) days         | Surveillance of recovered patients                                  | Cough/expectoration (13.1%, 3rd day) congestion/dyspnea (6.6%, 3rd day, 8.6%, 7th day, and 10.4%, 14th day); also fatigue and myalgia |

|   |                                                                                                                                 |                                                         |                            |                                |     |                         |                      |                                                                                    |                                                                                                                                                                                        |
|---|---------------------------------------------------------------------------------------------------------------------------------|---------------------------------------------------------|----------------------------|--------------------------------|-----|-------------------------|----------------------|------------------------------------------------------------------------------------|----------------------------------------------------------------------------------------------------------------------------------------------------------------------------------------|
| 4 | Early clinical and socio demographic experience with patients hospitalized with COVID-19 at a large American healthcare system. | Cian P. McCarthy et al, <i>EClinicalMedicine</i> , 2020 | Boston, Massachusetts, USA | Case series                    | 213 | Post hospital discharge | 80 IQR, 68- 84) days | Identify COVID-19 patients readmitted to hospitals.                                | Persistent COVID-19 symptoms (18.2%) pneumonia (13.6%) and pulmonary embolism (9.1%).                                                                                                  |
| 5 | Psychological distress and its correlates among COVID-19 survivors during early convalescence across age groups.                | Xin Cai, et al, <i>Am J Geriatr Psychiatry</i> , 2020   | China                      | Cross-sectional (Survey)       | 126 | post healing            | 14 days              | Examine the psychological distress and the associated predictor factors            | The survivors aged 60 or above experienced less symptoms of severe stress response, depression, and anxiety than younger survivors                                                     |
| 6 | Clinical features and outcomes of discharged coronavirus disease 2019 patients: a prospective cohort study                      | Xingyu Wang et al, <i>QJM</i> , 2020.                   | China                      | Prospective, Cohort study      | 131 | Post hospital discharge | 4 weeks              | Investigate clinical outcomes of COVID-19 patients after recovery.                 | Cough (29.01%), fatigue (7.63%), chest tightness (6.11%), dyspnea (3.82%), chest pain (3.05%) and palpitation (1.53%). These symptoms constantly decreased in 4 weeks after-discharge. |
| 7 | Clinical characteristics and short term outcomes after recovery from COVID-19 in                                                | Farhana Akter et al, <i>Diabetes Metab Syndr</i> , 2020 | Bangladesh                 | Cross-sectional, observational | 734 | Post Cure               | 4 weeks              | Compare the clinical manifestations and long-term complications among the diabetic | Individuals with diabetes (40%) were found to have significantly ( $P < 0.05$ ) higher levels of pain                                                                                  |

|    |                                                                                                                            |                                                  |       |                                                      |      |                         |                 |                                                                                          |                                                                                                                                                                 |
|----|----------------------------------------------------------------------------------------------------------------------------|--------------------------------------------------|-------|------------------------------------------------------|------|-------------------------|-----------------|------------------------------------------------------------------------------------------|-----------------------------------------------------------------------------------------------------------------------------------------------------------------|
|    | patients with and without diabetes in Bangladesh                                                                           |                                                  |       |                                                      |      |                         |                 | and non-diabetic COVID-19 patients.                                                      | than those without diabetes (27.3%)                                                                                                                             |
| 8  | Characterization of patients who return to hospital following discharge from hospitalization for COVID-19.                 | Sulaiman S. et al, <i>J Gen Intern Med.</i> 2020 | USA   | Retrospective , Cohort study                         | 2864 | Post hospital discharge | 14 days         | Evaluate the reasons to return hospital after discharge                                  | Respiratory distress (50%).                                                                                                                                     |
| 9  | The landscape of cognitive function in recovered COVID-19 patients.                                                        | Hetong Zhou et al, <i>J Psychiatr Res,</i> 2020  | China | Observational (cross-sectional)                      | 29   | Post hospital discharge |                 | Evaluate the impacts of COVID-19 on cognitive functions                                  | cognitive impairments exist even in patients recovered from COVID-19                                                                                            |
| 10 | Residual clinical damage after COVID-19: A retrospective and prospective observational cohort study.                       | Rebecca De Lorenzo et al, <i>PLoS One,</i> 2020  | Italy | Retrospective and prospective observational , cohort | 185  | Post hospital discharge | 23 (20-29) days | Investigate whether COVID-19 causes residual dysfunction                                 | (31.3%) dyspnea, (22.2%) tachypnea, (5.4%) malnourished, (25.4%) new-onset cognitive impairment.                                                                |
| 11 | COVID-19 is associated with clinically significant weight loss and risk of malnutrition, independent of hospitalization: A | Luigi Di Filippo et al, <i>Clin Nutr,</i> .2020  | Italy | Prospective cohort study                             | 213  | Post hospital discharge | 23 (23-30) days | Assess the incidence of unintentional weight loss and malnutrition in COVID-19 survivors | Greater systemic inflammation (C-reactive protein 62.9 [29.0-129.5] vs. 48.7 [16.1-96.3] mg/dL, Impaired renal function (23.7% vs. 8.7% of patients, and longer |

|    |                                                                                                   |                                                           |       |                                                      |     |                         |                  |                                                                                                              |                                                                                                                                                              |
|----|---------------------------------------------------------------------------------------------------|-----------------------------------------------------------|-------|------------------------------------------------------|-----|-------------------------|------------------|--------------------------------------------------------------------------------------------------------------|--------------------------------------------------------------------------------------------------------------------------------------------------------------|
|    | post-hoc analysis of a prospective cohort study                                                   |                                                           |       |                                                      |     |                         |                  |                                                                                                              | disease duration 32[27-41] vs. 24 [21-30] days in those patients compared to healthy survivors.                                                              |
| 12 | Clinical characteristics of recovered COVID-19 patients with re-detectable positive RNA test.     | Jianghong An et al,<br><i>Ann Transl Med, 2020</i>        | China | Retrospective cohort                                 | 262 | Post hospital discharge | 14 days          | Identify the characteristics, significance and potential cause of positive SARS-CoV-2 diagnoses in recovered | Fewer symptoms but similar plasma antibody levels during RP patients' hospitalization compared to NRP patients.                                              |
| 13 | Clinical characteristics of “re-positive” discharged COVID-19 pneumonia patients in Wuhan, China. | Shengyang He et al,<br><i>Sci Rep,2020.</i>               | China | Retrospective study                                  | 267 | Post hospital discharge | 14 days          | Analyze the clinical characteristics of re-positive discharged COVID-19 patients                             | Coughing (21%), phlegm (13%), palpitate (34%), chest tightness (25%), paracenesesthesia (12%) and fatigue (48%) were common residual symptoms post recovery. |
| 14 | Clinical sequelae of COVID-19 survivors in Wuhan, China: a single-center longitudinal study.      | Qiutang Xiong et al,<br><i>Clin Microbiol Infect,2021</i> | China | Telephone follow-up survey prospective observational | 538 | Post hospital discharge | 97 days (95-102) | Assess the risk factors for the main clinical sequelae in COVID-19 survivors                                 | Clinical sequelae were general symptoms (49.6%), respiratory symptoms (39 %) Cardiac symptoms (13%), psychosocial symptoms (22.7%) and alopecia (28.6%)      |

|    |                                                                                                                 |                                                           |       |                                          |     |                         |                                       |                                                                                                  |                                                                                                                                                                      |
|----|-----------------------------------------------------------------------------------------------------------------|-----------------------------------------------------------|-------|------------------------------------------|-----|-------------------------|---------------------------------------|--------------------------------------------------------------------------------------------------|----------------------------------------------------------------------------------------------------------------------------------------------------------------------|
| 15 | Cardiac involvement in patients recovered from COVID-2019 identified using magnetic resonance imaging.          | Lu Huang et al,<br><i>JACC Cardiovasc Imaging</i> , 2020. | China | Retrospective cohort                     | 26  | Post hospital discharge | 47 days (IQR: 36 to 58 days)          | Evaluate cardiac involvement in COVID-19 survivors.                                              | (31%) patients had decreased right ventricle functional parameters including ejection fraction, cardiac index, and stroke volume.                                    |
| 16 | Predictive factors for a new positive nasopharyngeal swab among patients recovered from COVID-19.               | Francesco Landi,<br><i>Am J Prev Med</i> 2020             | Italy | Observational study prospective study    | 131 | Post hospital discharge | 55.8 (SD=10.8) days<br>30.0 (SD=14.2) | Identify the risk factors associated with persistent positive nasopharyngeal swab.               | (16.7%) tested Positive again. Some symptoms such as fatigue (51%), dyspnea (44%), and coughing (17%) were still present in a significant percentage of the patients |
| 17 | Incidence of post-traumatic stress disorder after coronavirus disease.                                          | Min Cheol Chang et al,<br><i>Healthcare (Basel)</i> ,2020 | Korea | Telephone interviews                     | 64  | Post hospital discharge | 75.7 ± 20.0 days                      | Investigate the prevalence of post-traumatic stress disorder (PTSD) among patients with COVID-19 | 20.3% of the patients had PTSD                                                                                                                                       |
| 18 | Follow-up study of the pulmonary function and related physiological characteristics of COVID-19 survivors three | Yu-miao Zhao et al ,<br><i>EclinicalMedicine</i> , 2020   | China | Retrospective , multicenter cohort study | 55  | Post hospital discharge | 3 months                              | The long-term pulmonary function and related physiological characteristics of COVID-19 survivors | The presenting symptoms included gastrointestinal (GI) symptoms (30.91%), headache (18.18%), fatigue (16.36%), exertion dyspnea (14.55%), as well as                 |

|    |                                                                                                                                           |                                                    |                         |                       |      |                                        |                                 |                                                                                      |                                                                                          |
|----|-------------------------------------------------------------------------------------------------------------------------------------------|----------------------------------------------------|-------------------------|-----------------------|------|----------------------------------------|---------------------------------|--------------------------------------------------------------------------------------|------------------------------------------------------------------------------------------|
|    | months after recovery.                                                                                                                    |                                                    |                         |                       |      |                                        |                                 |                                                                                      | cough and sputum (1.81%).                                                                |
| 19 | Stigma in coronavirus disease-19 survivors in Kashmir, India: A cross-sectional exploratory study.                                        | Shabir Ahmad Dar et al,<br><i>PLoS One</i> , 2020. | India                   | Cross-sectional       | 91   | Post hospital discharge                | 11.7±5.1 [Range(R) = 7–21] days | Assess the magnitude and correlates of stigma in these survivors.                    | 98% of survivors provided at least one stigma endorsing response                         |
| 20 | ‘Long-COVID’: a cross-sectional study of persisting symptoms, biomarker and imaging abnormalities following hospitalization for COVID-19. | Swapna Mandal et al ,<br><i>Thorax</i> ,2021.      | U.K.                    | Cross-sectional study | 384  | Post hospital discharge                | median 54 days (IQR 47–59)      | Provide the first report of physical and psychological symptom burden, blood markers | 53% reported persistent breathlessness, 34% cough and 69% fatigue. 14.6% had depression. |
| 21 | Persistent symptoms 3 months after a SARS-CoV-2 infection: the post-COVID-19 syndrome.                                                    | Yvonne M.J. et al,<br><i>ERJ Open Res</i> , 2020.  | Netherlands and Belgium | Cross-sectional       | 2113 | Post-COVID-19 syndrome (post-recovery) | 79±17 days                      | Assess whether multiple relevant symptoms recover following the onset of symptoms.   | Fatigue and dyspnea were the most prevalent symptoms during the infection.               |

|    |                                                                                                                           |                                                            |       |                                          |     |                         |                          |                                                                                                             |                                                                                                                                                                             |
|----|---------------------------------------------------------------------------------------------------------------------------|------------------------------------------------------------|-------|------------------------------------------|-----|-------------------------|--------------------------|-------------------------------------------------------------------------------------------------------------|-----------------------------------------------------------------------------------------------------------------------------------------------------------------------------|
| 22 | Assessment and characterization of post-COVID-19 manifestations.                                                          | Marwa Kamal et al,<br><i>Int J Clin Pract</i> , 2021.      | Egypt | Cross-sectional                          | 287 | Post hospital discharge |                          | Investigate and characterize the manifestations which appear after eradication of the coronavirus infection | Fatigue (72.8%), anxiety (38%), joints pain (31.4%), continuous headache (28.9%), chest pain (28.9%), dementia (28.6%), depression (28.6%) and dyspnea (28.2%).             |
| 23 | Patient outcomes after hospitalization with COVID-19 and implications for follow-up: results from a prospective UK cohort | David T Arnold et al,<br><i>Thorax</i> , 2021              | UK    | Prospective cohort (observational study) | 131 | Post hospital discharge | 90 days (IQR 80–97 days) | A systematic clinical follow-up of COVID-19 survivors.                                                      | (74%) had persistent symptoms (breathlessness and excessive fatigue). clinically significant abnormalities in chest radiograph, exercise tests, blood tests and spirometry. |
| 24 | Post-discharge health status and symptoms in patients with severe COVID-19.                                               | Himali Weerahandi, et al,<br><b>Pre-Print</b> ,2020.       | USA   | Prospective cohort study                 | 161 | Post hospital discharge | 30-40 days               | Characterize overall health, physical health and mental health of patients.                                 | Participants also rated their physical health and mental health as worse in their post-COVID state                                                                          |
| 25 | Nailfold capillaroscopy findings in patients with coronavirus disease 2019: Broadening the spectrum of COVID-19           | Gerlando Natalelloa et al,<br><i>Microvasc Res</i> , 2021. | Italy | Prospective study                        | 54  | Post hospital discharge | 31.6 ± 9.3 days          | Assess microvasculature through nailfold video capillaroscopy (NVC) in COVID-19 patients.                   | Enlarged capillaries (85.2% of patients), meandering capillaries (81.4% of patients), and pericapillary edema (70.4% of patients).                                          |

|    |                                                                                                                                            |                                                                |              |                                 |     |                                            |                                     |                                                                                                           |                                                                                                                 |
|----|--------------------------------------------------------------------------------------------------------------------------------------------|----------------------------------------------------------------|--------------|---------------------------------|-----|--------------------------------------------|-------------------------------------|-----------------------------------------------------------------------------------------------------------|-----------------------------------------------------------------------------------------------------------------|
|    | microvascular involvement.                                                                                                                 |                                                                |              |                                 |     |                                            |                                     |                                                                                                           |                                                                                                                 |
| 26 | Follow up of patients with severe coronavirus disease 2019 (COVID-19): Pulmonary and extra-pulmonary disease sequelae.                     | Ayham Daher et al,<br><i>Respir Med</i> , 2020.                | Germany      | Prospective study               | 33  | Post hospital discharge                    | 6 weeks<br>56 (48–71)               | Evaluating pulmonary and extra pulmonary sequelae of COVID-19 after recovery                              | (33%) had dyspnea, (33%) had cough, and 15 (45%) suffered from fatigue.                                         |
| 27 | Residual Lung Injury in Patients Recovering From COVID-19 Critical Illness: A Prospective Longitudinal Point-of-Care Lung Ultrasound Study | Abdulrahman Alharthy et al,<br><i>J Ultrasound Med</i> , 2021. | Saudi Arabia | Prospective observational study | 127 | Post hospital discharge                    | 2 months/<br>4 months               | Track Lung Ultrasound findings of critically ill COVID-19 patients for 4 months after hospital discharge. | (48.8%) had difficulty breathing, were complaining of fatigue, and were unable to completed 6-minute walk test. |
| 28 | Comprehensive health assessment three months after recovery from acute COVID-19                                                            | Bram van den Borst,<br><i>Clin Infect Dis</i> , 2021.          | Netherlands  | Prospective observational study | 124 | Post-recovery -<br>Post hospital discharge | 13.0 (2.2) weeks/<br>10 (1.7) weeks | Assess lung Function impairment, and residual pulmonary parenchymal abnormalities.                        | 99% of patients had decreased ground-glass opacities (GGO).                                                     |



|    |                                                                                                 |                                                                   |         |                           |     |                         |                        |                                                                                                                                          |                                                                                                                                              |
|----|-------------------------------------------------------------------------------------------------|-------------------------------------------------------------------|---------|---------------------------|-----|-------------------------|------------------------|------------------------------------------------------------------------------------------------------------------------------------------|----------------------------------------------------------------------------------------------------------------------------------------------|
| 29 | Psychopathological profile in COVID-19 patients including healthcare workers: the implications. | D.P.R. Chieffo et al,<br><i>Eur Rev Med Pharmacol Sci</i> , 2020. | Italy   | Cross-sectional           | 34  | Post hospital discharge | 4 months               | Investigate the psychological impact and psychopathological outcome of patients affected by COVID-19                                     | frequently reported items: “Nervousness or shakiness inside”, “Feeling blue,” “Feeling fearful”                                              |
| 30 | Clinical status and lung function 10 weeks after severe SARS-CoV-2 infection.                   | Jelle Smet et al,<br><i>Respir Med</i> , 2021.                    | Belgium | Cross-sectional study     | 220 | After recovery          | 74 ±12 days / 10 weeks | Assess the residual symptoms, lung function and chest CT after recovery in the outpatient clinic (for 10 weeks after COVID-19 pneumonia) | (38%) had restrictive pulmonary function, Fatigue (66%) and dyspnea (47%)                                                                    |
| 31 | Short-term Neuropsychiatric Outcomes and Quality of Life in COVID-19 Survivors.                 | Raul Mendez et al,<br><i>J Intern Med</i> , 2021.                 | Spain   | Prospective study         | 179 | Post hospital discharge | 2 months               | Evaluate neurocognitive function, and psychiatric symptoms.                                                                              | Delayed verbal memory (11.8%), verbal fluency (34.6%), anxiety 29.6%, depression (26.8%), and post-traumatic stress disorder (25.1%).        |
| 32 | Cardiopulmonary exercise testing in COVID-19 patients at 3 months follow-up                     | Piero Clavario et al,<br><i>Int J Cardiol</i> , 2021.             | Italy   | Prospective, Cohort study | 200 | Post hospital discharge | 3 months               | Determine functional capacity of Non-severe COVID-19 survivors.                                                                          | (80.0%) patients reported at least one disabling symptom. (59.0%) patients complained of dyspnea, of whom (27.0%) were in NYHA class III/IV, |

|    |                                                                                                                                                                 |                                                        |     |                                                      |     |                         |                             |                                                                             |                                                                                                               |
|----|-----------------------------------------------------------------------------------------------------------------------------------------------------------------|--------------------------------------------------------|-----|------------------------------------------------------|-----|-------------------------|-----------------------------|-----------------------------------------------------------------------------|---------------------------------------------------------------------------------------------------------------|
|    |                                                                                                                                                                 |                                                        |     |                                                      |     |                         |                             |                                                                             | (31.5%) had chest pain, (57.5%) had fatigue, and (25.5%) complained of palpitations.                          |
| 33 | Medium-term effects of SARS-CoV-2 infection on multiple vital organs, exercise capacity, cognition, quality of life and mental health, post-hospital discharge. | Betty Raman et al,<br><i>EclinicalMedicine</i> , 2021. | UK  | Prospective cohort                                   | 85  | Post-hospital discharge | 3 months                    | Measure the effects of COVID-19 on multiple organ health, exercise Capacity | 64% of patients experienced persistent breathlessness and 55% complained of significant fatigue.              |
| 34 | Chest radiography is a poor predictor of respiratory symptoms and functional impairment in survivors of severe COVID-19 pneumonia                               | Rebecca F. et al,<br><i>ERJ Open Res</i> , 2021.       | UK  | Prospective single-centre observational cohort study | 119 | Post-hospital discharge | 2 months<br>61 (51–67) days | Assess COVID-19 survivors                                                   | Fatigue (68%), sleep disturbance (57%) and breathlessness (32%).                                              |
| 35 | Three-month outcomes in hospitalized COVID-19 patients                                                                                                          | Jude PJ Savarraj et al,<br><b>Pre-Print</b> , 2020     | USA | Prospective single-center study                      | 48  | Post hospital discharge | 3 months                    | Characterize long-term neurologic outcomes after COVID-19.                  | 71% of the patients still experienced neurological symptoms at 3 months.<br><br>Fatigue (42%) and PTSD (29%). |

|    |                                                                                                         |                                                                  |             |                                                 |     |                                      |                            |                                                                                                           |                                                                                                                                             |
|----|---------------------------------------------------------------------------------------------------------|------------------------------------------------------------------|-------------|-------------------------------------------------|-----|--------------------------------------|----------------------------|-----------------------------------------------------------------------------------------------------------|---------------------------------------------------------------------------------------------------------------------------------------------|
| 36 | A prospective study of 12-week respiratory outcomes in COVID-19-related hospitalizations                | Aditi S Shah et al,<br><i>Thorax</i> 2020                        | Canada.     | Prospective consecutive cohort                  | 60  | Post recovery follow-up for 12 weeks | 12 weeks                   | Describe the long-term health outcomes in COVID-19 survivors.                                             | pulmonary function variable was abnormal in 58% of patients                                                                                 |
| 37 | Immunity status of Health Care Workers post recovery from COVID-19: An online longitudinal panel survey | Shah S B, Chawla et al,<br><b>Pre-Print</b> 2020.                | India       | Prospective longitudinal panel survey questions | 151 | Post recovery                        | 1-2 months                 | Shed light on the immunity status of Health care workers                                                  | Chronic fatigue (33.11%), breathlessness (13.25%), body ache (4.64%), headache (3.31%), myalgia, joint pain, lower limb pain and gastritis. |
| 38 | Pulmonary function and health-related quality of life after COVID-19 pneumonia.                         | Talman, S Boonman-de Winter et al,<br><i>Respir Med</i> , 2021.  | Netherlands | Prospective longitudinal cohort study           | 101 | Post hospital discharge              | 6 weeks                    | Examine the impact of COVID-19 pneumonia on pulmonary function.                                           | The majority of COVID-19 pneumonia survivors had abnormal diffusion capacity six weeks.                                                     |
| 39 | Chest CT in COVID-19 pneumonia: what are the findings in mid-term follow-up                             | Seyed Mohammad H.Tabatabae et al,<br><i>Emerg Radiol</i> , 2020. | Iran        | Retrospective study                             | 52  | Post hospital discharge              | 3 months<br>91 ± 15.5 days | Assess the rate of complete resolution, and determine the individuals at risk for residual abnormalities. | (57.7%) demonstrate complete resolution of pulmonary findings.                                                                              |

|    |                                                                                                                                                 |                                                          |                         |                       |       |                                           |             |                                                                                                      |                                                                                                                                                                                                                            |
|----|-------------------------------------------------------------------------------------------------------------------------------------------------|----------------------------------------------------------|-------------------------|-----------------------|-------|-------------------------------------------|-------------|------------------------------------------------------------------------------------------------------|----------------------------------------------------------------------------------------------------------------------------------------------------------------------------------------------------------------------------|
| 40 | Cognitive deficits in people who have recovered from COVID-19 relative to controls: An N=84,285 online study.                                   | Adam Hampshire et al,<br><i>EclinicalMedicine</i> ,2020. | UK                      | Cross-sectional study | 84285 | Post recovery                             |             | Reveal neurological problems in severely affected COVID-19 patients.                                 | Hospitalized patients showed large-medium scaled global performance deficits dependent on whether they were or were not put onto a ventilator.                                                                             |
| 41 | Care dependency in non-hospitalized patients with COVID-19.                                                                                     | Anouk W. Vaes et al,<br><i>J Clin Med</i> , 2020.        | Netherlands and Belgium | Cross-sectional study | 1837  | Follow up long-term symptoms for 3 months | 79 ±17 days | Explore the level of care Dependency.                                                                | The care-dependent patients had a higher prevalence of mild to very severe fatigue (100.0% vs. 94.5%), muscle weakness (100.0% vs. 86.2%), pain (96.9% vs. 86.2%), headache (86.2% vs. 72.4%), and fever (46.2% vs. 28.3%) |
| 42 | Plasma Metabolomic Profiles and Clinical Features in Recovered COVID-19 Patients Without Previous Underlying Diseases 3 Months After Discharge. | Wang Sufei,<br><b>Pre-Print</b> , 2020                   | China                   | Prospective study     | 135   | Post hospital discharge                   | 3 months    | Profile the plasma metabolites in asymptomatic, moderate, and severe and critical COVID-19 patients. | This study showed that the alterations in plasma metabolite profiles in recovered asymptomatic, moderate and critical patients progressed gradually as compared with health control.                                       |

|    |                                                                                                                                                                              |                                                                     |       |                                  |     |                         |                                 |                                                                                         |                                                                                                                                                                                                          |
|----|------------------------------------------------------------------------------------------------------------------------------------------------------------------------------|---------------------------------------------------------------------|-------|----------------------------------|-----|-------------------------|---------------------------------|-----------------------------------------------------------------------------------------|----------------------------------------------------------------------------------------------------------------------------------------------------------------------------------------------------------|
| 43 | Airway, voice and swallow outcomes following endotracheal intubation and mechanical ventilation for COVID-19 pneumonitis: preliminary results of a prospective cohort study. | Benjamin Miller, Chrysostoms et al,<br><br><i>Br J Surg</i> , 2021. | UK    | Retrospective cohort study       | 141 | Post-hospital discharge | 6-12 week                       | Impact of COVID-19 critical illness on Laryngotracheal morbidity.                       | The COVID-19 cohort demonstrated higher overall rates of self-reported airway dyspnoea, voice and swallow difficulties (airway 59% vs 44% and 31%, voice 40% vs 19% and 19%, swallow 21% vs 6% and 12%). |
| 44 | Clinical and immune-serological status 12 weeks after infection with COVID-19: prospective observational study                                                               | Lucía Valiente-De Santis et al,<br><br><b>Pre-Print</b> 2020.       | Spain | Prospective, single-center study | 108 | Post hospital discharge | 12 weeks                        | Assess the functional status, persistence of symptoms and immune serological situation. | 75.9% presented some type of symptoms, with dyspnea being the most common. A D-dimer >500 ng/mL was detected in (31.4%) patients.                                                                        |
| 45 | Persistence of symptoms and quality of life at 35 days after hospitalization for COVID-19 infection                                                                          | Laurie G. Jacobs et al,<br><br><i>PLoS One</i> , 2020.              | USA   | Prospective cohort study         | 183 | Post hospital discharge | 35 ± 5 days                     | Estimate the persistent COVID-19 symptoms in survivors                                  | fatigue (55.0%), dyspnea (45.3%), muscular pain (51%) were the persistent symptoms                                                                                                                       |
| 46 | Follow-up study on serum cholesterol profiles in recovered COVID-19 patients.                                                                                                | Guiling Li et al,<br><br><i>BMC Infect Dis</i> , 2021               | China | Prospective cohort study         | 107 | Post hospital discharge | 100 (96, 116) days (3–6) months | Estimate lipid levels have improved in recovered patients                               | LDL-c and HDL-c levels were significantly higher at follow-up than at admission in                                                                                                                       |

|    |                                                                                                       |                                                            |           |                                           |     |                                               |                              |                                                               |                                                                                                                                                                                             |
|----|-------------------------------------------------------------------------------------------------------|------------------------------------------------------------|-----------|-------------------------------------------|-----|-----------------------------------------------|------------------------------|---------------------------------------------------------------|---------------------------------------------------------------------------------------------------------------------------------------------------------------------------------------------|
|    |                                                                                                       |                                                            |           |                                           |     |                                               |                              |                                                               | severe/critical cases (p < 0.05).                                                                                                                                                           |
| 47 | Dyspnea, lung function and CT findings three months after hospital admission for COVID-19             | Tøri Vigeland Lerum et al,<br><i>Eur Respir J</i> , 2021.  | Norway    | Prospective cohort study                  | 103 | Post hospital discharge                       | 3 months                     | Describe self-reported dyspnea, quality of life               | Half of all participants had persistent dyspnea on exertion.                                                                                                                                |
| 48 | Smell and taste loss in COVID-19 patients: assessment outcomes in a Victorian population              | Lukas Horvatha et al,<br><i>Acta Otolaryngol</i> 2021.     | Australia | Retrospective , descriptive study         | 102 | Post recovery follow up of long-term symptoms | 83 ±19.2 days (Three months) | Assess the frequency of olfactory and gustatory disturbances. | High rates of smell (65%) and taste disturbance (63%) were noted.                                                                                                                           |
| 49 | Three-Month Follow-Up Study of Survivors of Coronavirus Disease 2019 after Discharge.                 | Limei Liang et al,<br><i>J Korean Med Sci</i> , 2020       | China     | Prospective observational follow-up study | 76  | Post hospital discharge                       | 3 Months                     | Characterize 3-month outcomes of patients who survived COVID  | Most of the survivors had symptoms including fever, sputum production, fatigue, diarrhea, dyspnea, cough, chest tightness on exertion and palpitations in the three months after discharge. |
| 50 | Outcomes of cardiovascular magnetic resonance imaging in patients recently recovered from coronavirus | Valentina O Puntmann et al,<br><i>JAMA Cardiol</i> , 2020. | Germany,  | Prospective observational cohort study,   | 100 | After recovery follow-up                      | 71 (64-92) days              | Evaluate the presence of myocardial injury.                   | High-sensitivity troponin T (hsTnT) was detectable (greater than 3 pg/mL) in patients recently recovered from COVID-19 (71%) and significantly elevated                                     |

|    |                                                                                                                              |                                                                    |                |                                |     |                                                        |                     |                                                           |                                                                                                                        |
|----|------------------------------------------------------------------------------------------------------------------------------|--------------------------------------------------------------------|----------------|--------------------------------|-----|--------------------------------------------------------|---------------------|-----------------------------------------------------------|------------------------------------------------------------------------------------------------------------------------|
|    | disease 2019 (COVID-19).                                                                                                     |                                                                    |                |                                |     |                                                        |                     |                                                           | (greater than 13.9 pg/mL) in patients (5%).                                                                            |
| 51 | Pulmonary Dysfunction in Patients Recovered from COVID-19 Pneumonia: A 6-Month Follow-up Study.                              | Xianglin Meng et al, <i>Radiology</i> , 2020.                      | China          | Prospective Cohort Study       | 46  | Post recovery follow-up                                | 3 months /6- months | Evaluate clinical features and pulmonary functions.       | Pulmonary interstitial changes due to COVID-19 pneumonia gradually reverse over time, pulmonary dysfunction is common. |
| 52 | High Prevalence of Pulmonary Sequelae at 3 Months after Hospital Discharge in Mechanically Ventilated Survivors of COVID-19. | Rob J.J. van Gassel et al, <i>Am J Respir Crit Care Med</i> , 2021 | Netherlands    | Prospective Cohort Study       | 94  | Post hospital discharge                                | 2 Month             | Long term respiratory sequelae persist in severe COVID-19 | High prevalence of diminished diffusion capacity                                                                       |
| 53 | Long COVID in the Faroe Islands-a longitudinal study among non-hospitalized patients.                                        | Maria Skaalum Petersen et al, <i>Clin Infect Dis</i> , 2021.       | Faroe Islands, | Prospective longitudinal study | 180 | Follow-up of Long COVID for non-hospitalized patients. | 81 days & 125 days. | Present long-lasting COVID-19 symptoms.                   | The most prevalent persistent symptoms were fatigue, loss of smell and taste, and arthralgia                           |
| 54 | Persistent symptoms after Covid-19: qualitative study of 114 “long Covid”                                                    | Emma Ladds et al, <i>BMC Health Serv Res</i> , 2020.               | UK             | Prospective cohort             | 114 | Post hospital discharge                                | 3 Month             | Document patients with long COVID.                        | Confusing illness with many, varied and often relapsing-remitting symptoms; a heavy                                    |

|    |                                                                                                                 |                                                        |                |                                                |     |                                                                            |                                   |                                                                                                                       |                                                                                                                                                                              |
|----|-----------------------------------------------------------------------------------------------------------------|--------------------------------------------------------|----------------|------------------------------------------------|-----|----------------------------------------------------------------------------|-----------------------------------|-----------------------------------------------------------------------------------------------------------------------|------------------------------------------------------------------------------------------------------------------------------------------------------------------------------|
|    | patients and draft quality principles for services.                                                             |                                                        |                |                                                |     |                                                                            |                                   |                                                                                                                       | sense of loss and stigma;                                                                                                                                                    |
| 55 | Cardiopulmonary recovery after COVID-19—an observational prospective multi-center trial                         | Thomas Sonnweber et al,<br><i>Eur Respir J</i> , 2021. | Australia;     | Prospective, multi-centre, observational study | 145 | 2 <sup>nd</sup> follow-up of post-COVID 19 patient for persistent symptoms | 63 ( ± 23) days                   | Evaluate the cardiopulmonary damage in subjects recovering from COVID-19.                                             | Dyspnea being most frequent (36%) and Cardiac impairment                                                                                                                     |
| 56 | Multiorgan impairment in low-risk individuals with post-COVID-19 syndrome: a prospective, community-based study | Andrea Dennis et al,<br><i>BMJ</i> , 2021.             | UK             | Prospective, longitudinal                      | 201 | Post recovery                                                              | 140 (IQR 105-160) days (3 months) | To assess medium-term organ impairment in symptomatic individuals following recovery from acute SARS-CoV-2 infection. | 70% of patients have impairment in one or more organs 4 months after initial COVID-19 symptoms. Fatigue (98%), Muscle aches (88%), breathlessness (87%), and headaches (83%) |
| 57 | Long Covid and the role of physical activity: a qualitative study.                                              | Helen Humphreys et al,<br><i>BMJ</i> , 2020.           | United Kingdom | Qualitative (Semi-structured interviews)       | 18  | Long COVID follow-up                                                       |                                   | Explore the lived experience of Long COVID                                                                            | It highlights the physical and social isolation experienced by people with Long COVID.                                                                                       |



|    |                                                                                                                              |                                                                               |        |                      |      |                                        |                                     |                                                                                                                                                                                                                      |                                                                                                                                                                                                                |
|----|------------------------------------------------------------------------------------------------------------------------------|-------------------------------------------------------------------------------|--------|----------------------|------|----------------------------------------|-------------------------------------|----------------------------------------------------------------------------------------------------------------------------------------------------------------------------------------------------------------------|----------------------------------------------------------------------------------------------------------------------------------------------------------------------------------------------------------------|
| 58 | Follow-up of adults with noncritical COVID-19 two months after symptom onset                                                 | Claudia Carvalho-Schneider et al,<br><br><i>Clin Microbiol Infect</i> , 2021. | France | Retrospective cohort | 150  | 2 months follow-up post symptoms onset | 32.7 ± 2.5 days.<br>59.7 ± 1.7 days | Describe the clinical evolution and predictors of symptom.<br>Comment: the study compared the symptoms severity and the appearance of new symptoms at day 7 during COVID 19 and post infection at day 30 and day 60. | Persisting symptoms were defined by the presence at Day 30 or Day 60 of at least one of the following: weight loss 5% severe dyspnea or asthenia.                                                              |
| 59 | Persistence of COVID-19 Symptoms after Recovery in Mexican Population                                                        | Carlos E. Galván-Tejada et al,<br><i>Int J Environ Res Public Health</i> 2020 | Mexico | Case-control study   | 219  | Post recovery                          | 14 days or more                     | Identify the risk of persistent symptoms in recovered from COVID-19                                                                                                                                                  | The presence of a post-COVID syndrome in which symptoms persist with diff errant frequency after recovering.                                                                                                   |
| 60 | Pre-existing conditions are associated with COVID patients' hospitalization, despite confirmed clearance of SARS-CoV-2 virus | Colin Pawlowski et al,<br><br><i>EclinicalMedicine</i> , 2020.                | USA    | Retrospective cohort | 1355 | Post recovery                          | 90 days                             | Identify complications which are enriched in the hospitalized post-clearance cohort                                                                                                                                  | The most significantly phenotypes are: pleural effusion (relative risk: 4.2, 95% C.I.: [2.1, 7.9], cardiac arrhythmias (RR: 5.3, 95% C.I.: [2.1, 12], and hyperglycemia (RR: Infinity, 95% C.I.: [1.8, 5,400]. |

|    |                                                                                                                                        |                                                               |         |                                   |       |                              |                  |                                                                                                                 |                                                                                                   |
|----|----------------------------------------------------------------------------------------------------------------------------------------|---------------------------------------------------------------|---------|-----------------------------------|-------|------------------------------|------------------|-----------------------------------------------------------------------------------------------------------------|---------------------------------------------------------------------------------------------------|
| 61 | Bidirectional associations between COVID-19 and psychiatric disorder: retrospective cohort studies of 62 354 COVID-19 cases in the USA | Maxime Taquet et al ,<br><i>The Lancet Psychiatry</i> , 2021. | USA     | Retrospective cohort              | 44779 | After diagnosis              | 3 months         | Assess whether a diagnosis of COVID-19 was associated with increased rates of subsequent psychiatric diagnoses. | The most frequent psychiatric diagnosis following COVID-19 was anxiety disorder                   |
| 62 | Three-month pulmonary function and radiological outcomes in COVID-19 survivors: a longitudinal patient cohort study.                   | Xuejiao Liao et al,<br><i>Open Forum Infect Dis</i> , 2020.   | China.  | Longitudinal patient cohort study | 172   | Post hospital discharge      | 90 (88-95) days. | Investigate pulmonary function and radiological outcomes                                                        | 6.40% still present pulmonary function abnormality,                                               |
| 63 | Clinical characteristics and post-intensive care outcomes of COVID-19 pneumonia                                                        | C NM, Lakey SM et al,<br><i>Int J Clin Pract</i> , 2020       | Ireland | Retrospective Case series         | 31    | Post ICU discharge follow-up | 65 days          | Evaluate the quality of life at a virtual post-intensive care                                                   | COVID-19 survivors have a marked functional and psychological morbidity impacting quality of life |

|    |                                                                                              |                                                                |             |                                                          |     |                         |                                      |                                                                                                                                                        |                                                                                                                                                                                              |
|----|----------------------------------------------------------------------------------------------|----------------------------------------------------------------|-------------|----------------------------------------------------------|-----|-------------------------|--------------------------------------|--------------------------------------------------------------------------------------------------------------------------------------------------------|----------------------------------------------------------------------------------------------------------------------------------------------------------------------------------------------|
| 64 | The Kids Are Not Alright: A Preliminary Report of Post-COVID Syndrome in University Students | Julie Walsh-Messinger et al,<br><br><b>Pre-Print</b><br>2020   | USA         | Cross-sectional                                          | 148 | Post recovery           |                                      | Investigate the prevalence and features of protracted symptoms in non-hospitalized university students who experienced mild-to-moderate acute illness. | 91% of COVID-19 positive participants reported “full recovery” from acute illness, 51% continued to experience protracted symptoms, of which 59% had persistent symptoms for $\geq 50$ days. |
| 65 | Psychological Consequences of Survivors of COVID-19 Pneumonia 1 Month after Discharge        | Hye Yoon Park et al,<br><br><i>J Korean Med Sci</i> ,<br>2020. | South Korea | Cross-sectional                                          | 10  | Post hospital discharge | 1 month                              | Investigate psychological problems in COVID-19 patients.                                                                                               | 10% reported depression, patients with high perceived stigma tended to have higher scores for PTSD symptoms.                                                                                 |
| 66 | Finding the 'right' GP: a qualitative study of the experiences of people with long-COVID     | Tom Kingstone et al,<br><br><i>BJGP</i> , 2020.                | China       | Qualitative methodology, with semi-structured interviews | 24  | Post recovery           | Interviewed patients with Long COVID | Explore experiences of people with persisting symptoms following COVID-19 infection.                                                                   | ‘Hard and heavy work’ enduring and managing symptoms and accessing care; living with uncertainty, helplessness and fear, particularly over whether recovery is possible                      |

|    |                                                                                                                            |                                                                |                   |                                     |     |                |                      |                                                                                                           |                                                                                                                                                        |
|----|----------------------------------------------------------------------------------------------------------------------------|----------------------------------------------------------------|-------------------|-------------------------------------|-----|----------------|----------------------|-----------------------------------------------------------------------------------------------------------|--------------------------------------------------------------------------------------------------------------------------------------------------------|
| 67 | Mental Health Status of Survivors Following COVID-19 in Wuhan, China: A Descriptive Study                                  | Chaomin Wu et al,<br><b>Pre-Print</b> , 2020                   | China             | Descriptive case series             | 370 | Post discharge | 22 days (20-30 days) | Report the post-discharge mental health status for these survivors and explore relevant influence factors | (16.2%) survivors had post-discharge cough and (12.2%) had breathlessness after activity. (5.4%) survivors had sputum production during the follow-up. |
| 68 | Olfactory dysfunction in patients after recovering from COVID-19                                                           | Martin Sylvester Otte et al,<br><i>Acta Otolaryngol</i> , 2020 | Helsinki, Finland | Cross-sectional Survey              | 91  | Post recovery  | 57.94 (±1.40) days   | Determine the olfactory function of COVID-19 recoveries by a detailed olfactory test.                     | 53.8% showed an olfactory performance within the normal range.                                                                                         |
| 69 | Mental health among COVID-19 survivors and healthcare workers exposed to COVID-19 in Wuhan, China: a cross-sectional study | Bin Chen et al,<br><b>Pre-Print</b> 2020.                      | China             | Cross-sectional, survey-based study | 20  | Post recovery  |                      | Evaluate mental health status of COVID-19 survivors and healthcare workers, and the impacting factors.    | Psychological health status among all participants in Wuhan, China was not very serious, and the main problems were anxiety and psychoticism.          |
